# Supplementary material for: Single-component gold(i)-containing highly white-emissive crystals based on a polymorph doping strategy
Source: Royal Society of Chemistry journal article supplement (doi:10.1039/c9qm00274j), 2019-01-01
Supplement: c9qm00274j1.pdf [file c9qm00274j1.pdf]

*Electronic Supplementary Information*

**Single-component gold(I)-containing highly white-emissive crystals based on a  
polymorph doping strategy**

Yubao Dong,<sup>a</sup> Fei Zhu,<sup>a</sup> Zhao Chen,<sup>\*a,b</sup> Jun Yin<sup>a</sup> and Sheng Hua Liu<sup>\*a,c</sup>

<sup>a</sup> *Key Laboratory of Pesticide and Chemical Biology, Ministry of Education, College of Chemistry, Central China Normal University, Wuhan 430079, PR China. E-mail: chshliu@mail.ccnu.edu.cn; Fax: +86-27-67867725; Tel: +86-27-67867725.*

<sup>b</sup> *Jiangxi Key Laboratory of Organic Chemistry, Jiangxi Science and Technology Normal University, Nanchang 330013, PR China. E-mail: chenzhao666@126.com; Fax: +86-791-83831996; Tel: +86-791-83831996.*

<sup>c</sup> *State Key Laboratory of Structural Chemistry, Fujian Institute of Research on the Structure of Matter, Chinese Academy of Sciences, Fuzhou 350002, PR China*

**Contents**

|                              |          |
|------------------------------|----------|
| <b>1. Tables S1-S7 .....</b> | <b>2</b> |
| <b>2. Figs. S1-S8 .....</b>  | <b>8</b> |

## 1. Tables S1-S7

**Table S1.** Optical properties of three polymorphs **1W**, **1B** and **1G**.

| Sample    | $\lambda_{em}^a$ (nm) | $\Phi^b$ (%) | $\tau^c$ ( $\mu$ s) |                 |
|-----------|-----------------------|--------------|---------------------|-----------------|
| <b>1W</b> | 455, 500              | 88.2         | 15.29 (455 nm)      | 253.12 (500 nm) |
| <b>1B</b> | 455                   | 52.4         | 15.86 (455 nm)      |                 |
| <b>1G</b> | 455, 520              | 87.6         | 21.55 (455 nm)      | 192.59 (520 nm) |

<sup>a</sup>Emission maximum, <sup>b</sup>Absolute photoluminescence quantum yields, <sup>c</sup>Average lifetime.

**Table S2.** Structure determination summary of **1B**.

|                                                  |                                                             |
|--------------------------------------------------|-------------------------------------------------------------|
| Empirical formula                                | C <sub>18</sub> H <sub>15</sub> AuF <sub>5</sub> NO         |
| Formula weight                                   | 553.28                                                      |
| Temperature (K)                                  | 100(2)                                                      |
| Crystal system                                   | Monoclinic                                                  |
| Space group                                      | P2 <sub>1</sub> /c                                          |
| <i>a</i> (Å)                                     | 7.3042(9)                                                   |
| <i>b</i> (Å)                                     | 19.814(3)                                                   |
| <i>c</i> (Å)                                     | 11.9572(15)                                                 |
| $\alpha$ (deg)                                   | 90                                                          |
| $\beta$ (deg)                                    | 95.327(2)                                                   |
| $\gamma$ (deg)                                   | 90                                                          |
| <i>V</i> (Å <sup>3</sup> )                       | 1723.0(4)                                                   |
| <i>Z</i>                                         | 4                                                           |
| Density <sub>calcd</sub> (Mg/m <sup>3</sup> )    | 2.133                                                       |
| Absorption coefficient (mm <sup>-1</sup> )       | 8.596                                                       |
| F(000)                                           | 1048                                                        |
| Crystal size (mm <sup>3</sup> )                  | 0.20 x 0.20 x 0.10                                          |
| Theta range for data collection (deg)            | 2.00 to 26.00                                               |
| Index ranges                                     | -8<= <i>h</i> <=9, -24<= <i>k</i> <=23, -14<= <i>l</i> <=14 |
| Reflections collected                            | 12639                                                       |
| Independent reflections                          | 3377 [R(int) = 0.2015]                                      |
| Data / restraints / parameters                   | 3377 / 0 / 236                                              |
| Final R indices [I>2 $\sigma$ (I)]               | R1 = 0.0604, wR2 = 0.1386                                   |
| R indices (all data)                             | R1 = 0.0638, wR2 = 0.1421                                   |
| Goodness of fit on F <sup>2</sup>                | 1.042                                                       |
| Largest diff. peak and hole (e Å <sup>-3</sup> ) | 4.074 and -6.162                                            |

**Table S3.** Selective bond lengths [Å] and angles [°] of **1B**.

|              |           |                     |          |
|--------------|-----------|---------------------|----------|
| Au(1)-C(7)   | 1.984(8)  | F(4)-C(5)-C(4)      | 119.0(5) |
| Au(1)-C(1)   | 2.027(6)  | C(6)-C(5)-C(4)      | 119.3(5) |
| C(1)-C(6)    | 1.384(8)  | F(5)-C(6)-C(5)      | 116.1(5) |
| C(1)-C(2)    | 1.403(8)  | F(5)-C(6)-C(1)      | 118.9(5) |
| C(2)-C(3)    | 1.353(9)  | C(5)-C(6)-C(1)      | 125.0(5) |
| C(2)-F(1)    | 1.357(6)  | N(1)-C(7)-Au(1)     | 178.8(6) |
| C(3)-F(2)    | 1.347(7)  | C(9)-C(8)-N(1)      | 119.8(5) |
| C(3)-C(4)    | 1.395(8)  | C(9)-C(8)-C(13)     | 120.4(6) |
| C(4)-F(3)    | 1.312(7)  | N(1)-C(8)-C(13)     | 119.7(5) |
| C(4)-C(5)    | 1.391(8)  | C(10)-C(9)-C(8)     | 119.8(5) |
| C(5)-F(4)    | 1.333(7)  | C(10)-C(9)-H(9)     | 120.1    |
| C(5)-C(6)    | 1.372(9)  | C(8)-C(9)-H(9)      | 120.1    |
| C(6)-F(5)    | 1.362(7)  | C(9)-C(10)-C(11)    | 120.8(5) |
| C(7)-N(1)    | 1.127(9)  | C(9)-C(10)-H(10)    | 119.6    |
| C(8)-C(9)    | 1.387(8)  | C(11)-C(10)-H(10)   | 119.6    |
| C(8)-N(1)    | 1.391(8)  | O(1)-C(11)-C(10)    | 126.1(5) |
| C(8)-C(13)   | 1.423(8)  | O(1)-C(11)-C(12)    | 115.6(5) |
| C(9)-C(10)   | 1.377(8)  | C(10)-C(11)-C(12)   | 118.2(5) |
| C(9)-H(9)    | 0.93      | C(13)-C(12)-C(11)   | 121.7(5) |
| C(10)-C(11)  | 1.394(8)  | C(13)-C(12)-H(12)   | 119.1    |
| C(10)-H(10)  | 0.93      | C(11)-C(12)-H(12)   | 119.1    |
| C(11)-O(1)   | 1.344(7)  | C(12)-C(13)-C(8)    | 119.0(5) |
| C(11)-C(12)  | 1.425(8)  | C(12)-C(13)-H(13)   | 120.5    |
| C(12)-C(13)  | 1.340(8)  | C(8)-C(13)-H(13)    | 120.5    |
| C(12)-H(12)  | 0.93      | O(1)-C(14)-C(15)    | 106.8(5) |
| C(13)-H(13)  | 0.93      | O(1)-C(14)-H(14A)   | 110.4    |
| C(14)-O(1)   | 1.451(7)  | C(15)-C(14)-H(14A)  | 110.4    |
| C(14)-C(15)  | 1.505(9)  | O(1)-C(14)-H(14B)   | 110.4    |
| C(14)-H(14A) | 0.97      | C(15)-C(14)-H(14B)  | 110.4    |
| C(14)-H(14B) | 0.97      | H(14A)-C(14)-H(14B) | 108.6    |
| C(15)-C(16)  | 1.519(9)  | C(14)-C(15)-C(16)   | 112.9(6) |
| C(15)-H(15A) | 0.97      | C(14)-C(15)-H(15A)  | 109      |
| C(15)-H(15B) | 0.97      | C(16)-C(15)-H(15A)  | 109      |
| C(16)-C(17)  | 1.530(9)  | C(14)-C(15)-H(15B)  | 109      |
| C(16)-H(16A) | 0.97      | C(16)-C(15)-H(15B)  | 109      |
| C(16)-H(16B) | 0.97      | H(15A)-C(15)-H(15B) | 107.8    |
| C(17)-C(18)  | 1.535(12) | C(15)-C(16)-C(17)   | 113.7(6) |
| C(17)-H(17A) | 0.97      | C(15)-C(16)-H(16A)  | 108.8    |
| C(17)-H(17B) | 0.97      | C(17)-C(16)-H(16A)  | 108.8    |

|                 |          |                     |          |
|-----------------|----------|---------------------|----------|
| C(18)-H(18A)    | 0.96     | C(15)-C(16)-H(16B)  | 108.8    |
| C(18)-H(18B)    | 0.96     | C(17)-C(16)-H(16B)  | 108.8    |
| C(18)-H(18C)    | 0.96     | H(16A)-C(16)-H(16B) | 107.7    |
| C(7)-Au(1)-C(1) | 177.3(2) | C(16)-C(17)-C(18)   | 112.5(6) |
| C(6)-C(1)-C(2)  | 113.3(6) | C(16)-C(17)-H(17A)  | 109.1    |
| C(6)-C(1)-Au(1) | 123.5(4) | C(18)-C(17)-H(17A)  | 109.1    |
| C(2)-C(1)-Au(1) | 123.2(4) | C(16)-C(17)-H(17B)  | 109.1    |
| C(3)-C(2)-F(1)  | 117.3(5) | C(18)-C(17)-H(17B)  | 109.1    |
| C(3)-C(2)-C(1)  | 124.3(5) | H(17A)-C(17)-H(17B) | 107.8    |
| F(1)-C(2)-C(1)  | 118.4(5) | C(17)-C(18)-H(18A)  | 109.5    |
| F(2)-C(3)-C(2)  | 121.5(5) | C(17)-C(18)-H(18B)  | 109.5    |
| F(2)-C(3)-C(4)  | 118.2(6) | H(18A)-C(18)-H(18B) | 109.5    |
| C(2)-C(3)-C(4)  | 120.2(5) | C(17)-C(18)-H(18C)  | 109.5    |
| F(3)-C(4)-C(5)  | 121.1(5) | H(18A)-C(18)-H(18C) | 109.5    |
| F(3)-C(4)-C(3)  | 120.9(5) | H(18B)-C(18)-H(18C) | 109.5    |
| C(5)-C(4)-C(3)  | 118.0(6) | C(7)-N(1)-C(8)      | 174.4(7) |
| F(4)-C(5)-C(6)  | 121.7(5) | C(11)-O(1)-C(14)    | 117.1(4) |

**Table S4.** Structure determination summary of **1W**.

|                                               |                                                             |
|-----------------------------------------------|-------------------------------------------------------------|
| Empirical formula                             | C <sub>18</sub> H <sub>15</sub> AuF <sub>5</sub> NO         |
| Formula weight                                | 553.28                                                      |
| Temperature (K)                               | 100(2)                                                      |
| Crystal system                                | Monoclinic                                                  |
| Space group                                   | P2 <sub>1</sub> /c                                          |
| <i>a</i> (Å)                                  | 7.402(2)                                                    |
| <i>b</i> (Å)                                  | 19.562(5)                                                   |
| <i>c</i> (Å)                                  | 12.283(3)                                                   |
| $\alpha$ (deg)                                | 90                                                          |
| $\beta$ (deg)                                 | 97.320(4)                                                   |
| $\gamma$ (deg)                                | 90                                                          |
| <i>V</i> (Å <sup>3</sup> )                    | 1764.0(8)                                                   |
| <i>Z</i>                                      | 4                                                           |
| Density <sub>calcd</sub> (Mg/m <sup>3</sup> ) | 2.083                                                       |
| Absorption coefficient (mm <sup>-1</sup> )    | 8.396                                                       |
| F(000)                                        | 1048                                                        |
| Crystal size (mm <sup>3</sup> )               | 0.120 x 0.100 x 0.100                                       |
| Theta range for data collection (deg)         | 1.969 to 25.499                                             |
| Index ranges                                  | -8<= <i>h</i> <=8, -23<= <i>k</i> <=22, -12<= <i>l</i> <=14 |

|                                                  |                                                   |
|--------------------------------------------------|---------------------------------------------------|
| Reflections collected                            | 12438                                             |
| Independent reflections                          | 3271 [R(int) = 0.0478]                            |
| Data / restraints / parameters                   | 3271 / 0 / 236                                    |
| Final R indices [I>2sigma(I)]                    | R <sub>1</sub> = 0.0334, wR <sub>2</sub> = 0.0902 |
| R indices (all data)                             | R <sub>1</sub> = 0.0470, wR <sub>2</sub> = 0.0964 |
| Goodness of fit on F <sup>2</sup>                | 1.047                                             |
| Largest diff. peak and hole (e Å <sup>-3</sup> ) | 1.255 and -1.068                                  |

**Table S5.** Selective bond lengths [Å] and angles [°] of **1W**.

|              |           |                   |          |
|--------------|-----------|-------------------|----------|
| Au(1)-C(7)   | 1.974(9)  | C(7)-Au(1)-C(1)   | 177.5(3) |
| Au(1)-C(1)   | 2.025(7)  | C(6)-C(1)-C(2)    | 114.2(6) |
| C(1)-C(6)    | 1.372(8)  | C(6)-C(1)-Au(1)   | 122.8(5) |
| C(1)-C(2)    | 1.378(8)  | C(2)-C(1)-Au(1)   | 122.9(5) |
| F(6)-C(6)    | 1.348(7)  | C(11)-O(1)-C(14)  | 119.7(5) |
| O(1)-C(11)   | 1.336(7)  | C(5)-C(6)-F(6)    | 116.4(6) |
| O(1)-C(14)   | 1.422(8)  | C(5)-C(6)-C(1)    | 123.8(6) |
| F(1)-C(2)    | 1.362(7)  | F(6)-C(6)-C(1)    | 119.8(6) |
| F(3)-C(4)    | 1.330(7)  | C(8)-C(13)-C(12)  | 118.9(6) |
| C(6)-C(5)    | 1.348(9)  | C(8)-C(13)-H(13)  | 120.6    |
| C(13)-C(8)   | 1.362(8)  | C(12)-C(13)-H(13) | 120.6    |
| C(13)-C(12)  | 1.377(9)  | O(1)-C(11)-C(12)  | 124.8(6) |
| C(13)-H(13)  | 0.93      | O(1)-C(11)-C(10)  | 116.4(6) |
| F(5)-C(5)    | 1.340(7)  | C(12)-C(11)-C(10) | 118.7(6) |
| C(11)-C(12)  | 1.371(9)  | F(3)-C(4)-C(3)    | 120.7(6) |
| C(11)-C(10)  | 1.391(9)  | F(3)-C(4)-C(5)    | 120.0(6) |
| C(4)-C(3)    | 1.356(9)  | C(3)-C(4)-C(5)    | 119.3(6) |
| C(4)-C(5)    | 1.384(9)  | N(1)-C(7)-Au(1)   | 176.8(7) |
| F(2)-C(3)    | 1.333(7)  | F(1)-C(2)-C(3)    | 116.2(6) |
| C(7)-N(1)    | 1.128(9)  | F(1)-C(2)-C(1)    | 119.5(6) |
| C(2)-C(3)    | 1.365(9)  | C(3)-C(2)-C(1)    | 124.3(6) |
| C(8)-C(9)    | 1.394(9)  | C(13)-C(8)-C(9)   | 121.6(6) |
| C(8)-N(1)    | 1.396(9)  | C(13)-C(8)-N(1)   | 118.6(5) |
| C(12)-H(12)  | 0.93      | C(9)-C(8)-N(1)    | 119.9(6) |
| C(9)-C(10)   | 1.338(9)  | F(2)-C(3)-C(4)    | 120.0(6) |
| C(9)-H(9)    | 0.93      | F(2)-C(3)-C(2)    | 121.1(6) |
| C(10)-H(10)  | 0.93      | C(4)-C(3)-C(2)    | 118.8(6) |
| C(14)-C(15)  | 1.493(11) | C(11)-C(12)-C(13) | 120.7(6) |
| C(14)-H(14A) | 0.97      | C(11)-C(12)-H(12) | 119.7    |
| C(14)-H(14B) | 0.97      | C(13)-C(12)-H(12) | 119.7    |

|                     |           |                     |           |
|---------------------|-----------|---------------------|-----------|
| C(15)-C(16)         | 1.536(14) | F(5)-C(5)-C(6)      | 122.0(6)  |
| C(15)-H(15A)        | 0.97      | F(5)-C(5)-C(4)      | 118.4(6)  |
| C(15)-H(15B)        | 0.97      | C(6)-C(5)-C(4)      | 119.6(6)  |
| C(16)-C(17)         | 1.409(13) | C(10)-C(9)-C(8)     | 118.4(6)  |
| C(16)-H(16A)        | 0.97      | C(10)-C(9)-H(9)     | 120.8     |
| C(16)-H(16B)        | 0.97      | C(8)-C(9)-H(9)      | 120.8     |
| C(17)-C(18)         | 1.462(17) | C(9)-C(10)-C(11)    | 121.8(6)  |
| C(17)-H(17A)        | 0.97      | C(9)-C(10)-H(10)    | 119.1     |
| C(17)-H(17B)        | 0.97      | C(11)-C(10)-H(10)   | 119.1     |
| C(18)-H(18A)        | 0.96      | C(7)-N(1)-C(8)      | 176.2(6)  |
| C(18)-H(18B)        | 0.96      | O(1)-C(14)-C(15)    | 108.5(6)  |
| C(18)-H(18C)        | 0.96      | O(1)-C(14)-H(14A)   | 110       |
| C(15)-C(14)-H(14A)  | 110       | C(15)-C(16)-H(16B)  | 108.2     |
| O(1)-C(14)-H(14B)   | 110       | H(16A)-C(16)-H(16B) | 107.4     |
| C(15)-C(14)-H(14B)  | 110       | C(16)-C(17)-C(18)   | 114.0(10) |
| H(14A)-C(14)-H(14B) | 108.4     | C(16)-C(17)-H(17A)  | 108.8     |
| C(14)-C(15)-C(16)   | 111.5(8)  | C(18)-C(17)-H(17A)  | 108.8     |
| C(14)-C(15)-H(15A)  | 109.3     | C(16)-C(17)-H(17B)  | 108.8     |
| C(16)-C(15)-H(15A)  | 109.3     | C(18)-C(17)-H(17B)  | 108.8     |
| C(14)-C(15)-H(15B)  | 109.3     | H(17A)-C(17)-H(17B) | 107.6     |
| C(16)-C(15)-H(15B)  | 109.3     | C(17)-C(18)-H(18A)  | 109.5     |
| H(15A)-C(15)-H(15B) | 108       | C(17)-C(18)-H(18B)  | 109.5     |
| C(17)-C(16)-C(15)   | 116.3(9)  | H(18A)-C(18)-H(18B) | 109.5     |
| C(17)-C(16)-H(16A)  | 108.2     | C(17)-C(18)-H(18C)  | 109.5     |
| C(15)-C(16)-H(16A)  | 108.2     | H(18A)-C(18)-H(18C) | 109.5     |
| C(17)-C(16)-H(16B)  | 108.2     | H(18B)-C(18)-H(18C) | 109.5     |

**Table S6.** Structure determination summary of **1G**.

|                   |                                                     |
|-------------------|-----------------------------------------------------|
| Empirical formula | C <sub>18</sub> H <sub>15</sub> AuF <sub>5</sub> NO |
| Formula weight    | 553.28                                              |
| Temperature (K)   | 100(2)                                              |
| Crystal system    | Monoclinic                                          |
| Space group       | P2 <sub>1</sub> /c                                  |
| <i>a</i> (Å)      | 7.2889(4)                                           |
| <i>b</i> (Å)      | 19.8254(10)                                         |
| <i>c</i> (Å)      | 11.9641(6)                                          |
| $\alpha$ (deg)    | 90                                                  |
| $\beta$ (deg)     | 95.3060(10)                                         |
| $\gamma$ (deg)    | 90                                                  |

|                                                  |                                         |
|--------------------------------------------------|-----------------------------------------|
| $V$ (Å <sup>3</sup> )                            | 1764.0(8)                               |
| $Z$                                              | 4                                       |
| Density <sub>calcd</sub> (Mg/m <sup>3</sup> )    | 2.135                                   |
| Absorption coefficient (mm <sup>-1</sup> )       | 8.603                                   |
| $F(000)$                                         | 1048                                    |
| Crystal size (mm <sup>3</sup> )                  | 0.100 x 0.100 x 0.080                   |
| Theta range for data collection (deg)            | 1.994 to 30.496                         |
| Index ranges                                     | -10 ≤ h ≤ 9, -28 ≤ k ≤ 28, -17 ≤ l ≤ 14 |
| Reflections collected                            | 18008                                   |
| Independent reflections                          | 5219 [R(int) = 0.0316]                  |
| Data / restraints / parameters                   | 5219 / 0 / 236                          |
| Final R indices [I > 2σ(I)]                      | R1 = 0.0209, wR2 = 0.0489               |
| R indices (all data)                             | R1 = 0.0296, wR2 = 0.0647               |
| Goodness of fit on F <sup>2</sup>                | 1.109                                   |
| Largest diff. peak and hole (e Å <sup>-3</sup> ) | 0.739 and -0.691                        |

**Table S7.** Selective bond lengths [Å] and angles [°] of **1G**.

|             |          |                   |          |
|-------------|----------|-------------------|----------|
| Au(1)-C(7)  | 1.966(4) | F(4)-C(5)-C(6)    | 121.1(3) |
| Au(1)-C(1)  | 2.028(3) | C(4)-C(5)-C(6)    | 119.7(3) |
| C(1)-C(2)   | 1.380(4) | F(5)-C(6)-C(5)    | 116.6(3) |
| C(1)-C(6)   | 1.386(4) | F(5)-C(6)-C(1)    | 119.4(3) |
| C(2)-F(1)   | 1.361(4) | C(5)-C(6)-C(1)    | 123.9(3) |
| C(2)-C(3)   | 1.381(4) | N(1)-C(7)-Au(1)   | 177.6(3) |
| C(3)-F(2)   | 1.350(4) | C(9)-C(8)-C(13)   | 121.7(3) |
| C(3)-C(4)   | 1.377(5) | C(9)-C(8)-N(1)    | 118.8(3) |
| C(4)-F(3)   | 1.334(4) | C(13)-C(8)-N(1)   | 119.5(3) |
| C(4)-C(5)   | 1.378(5) | C(10)-C(9)-C(8)   | 119.6(3) |
| C(5)-F(4)   | 1.347(4) | C(10)-C(9)-H(9)   | 120.2    |
| C(5)-C(6)   | 1.379(4) | C(8)-C(9)-H(9)    | 120.2    |
| C(6)-F(5)   | 1.359(4) | C(9)-C(10)-C(11)  | 119.7(3) |
| C(7)-N(1)   | 1.152(4) | C(9)-C(10)-H(10)  | 120.1    |
| C(8)-C(9)   | 1.384(5) | C(11)-C(10)-H(10) | 120.1    |
| C(8)-C(13)  | 1.393(5) | O(1)-C(11)-C(12)  | 115.5(3) |
| C(8)-N(1)   | 1.399(4) | O(1)-C(11)-C(10)  | 124.7(3) |
| C(9)-C(10)  | 1.381(4) | C(12)-C(11)-C(10) | 119.7(3) |
| C(9)-H(9)   | 0.95     | C(13)-C(12)-C(11) | 120.8(3) |
| C(10)-C(11) | 1.399(4) | C(13)-C(12)-H(12) | 119.6    |
| C(10)-H(10) | 0.95     | C(11)-C(12)-H(12) | 119.6    |

|                 |            |                     |          |
|-----------------|------------|---------------------|----------|
| C(11)-O(1)      | 1.351(4)   | C(12)-C(13)-C(8)    | 118.4(3) |
| C(11)-C(12)     | 1.396(5)   | C(12)-C(13)-H(13)   | 120.8    |
| C(12)-C(13)     | 1.381(4)   | C(8)-C(13)-H(13)    | 120.8    |
| C(12)-H(12)     | 0.95       | O(1)-C(14)-C(15)    | 107.4(3) |
| C(13)-H(13)     | 0.95       | O(1)-C(14)-H(14A)   | 110.2    |
| C(14)-O(1)      | 1.439(4)   | C(15)-C(14)-H(14A)  | 110.2    |
| C(14)-C(15)     | 1.518(5)   | O(1)-C(14)-H(14B)   | 110.2    |
| C(14)-H(14A)    | 0.99       | C(15)-C(14)-H(14B)  | 110.2    |
| C(14)-H(14B)    | 0.99       | H(14A)-C(14)-H(14B) | 108.5    |
| C(15)-C(16)     | 1.517(5)   | C(16)-C(15)-C(14)   | 112.9(3) |
| C(15)-H(15A)    | 0.99       | C(16)-C(15)-H(15A)  | 109      |
| C(15)-H(15B)    | 0.99       | C(14)-C(15)-H(15A)  | 109      |
| C(16)-C(17)     | 1.518(5)   | C(16)-C(15)-H(15B)  | 109      |
| C(16)-H(16A)    | 0.99       | C(14)-C(15)-H(15B)  | 109      |
| C(16)-H(16B)    | 0.99       | H(15A)-C(15)-H(15B) | 107.8    |
| C(17)-C(18)     | 1.522(6)   | C(15)-C(16)-C(17)   | 113.2(3) |
| C(17)-H(17A)    | 0.99       | C(15)-C(16)-H(16A)  | 108.9    |
| C(17)-H(17B)    | 0.99       | C(17)-C(16)-H(16A)  | 108.9    |
| C(18)-H(18A)    | 0.98       | C(15)-C(16)-H(16B)  | 108.9    |
| C(18)-H(18B)    | 0.98       | C(17)-C(16)-H(16B)  | 108.9    |
| C(18)-H(18C)    | 0.98       | H(16A)-C(16)-H(16B) | 107.7    |
| C(7)-Au(1)-C(1) | 177.76(13) | C(16)-C(17)-C(18)   | 112.4(3) |
| C(2)-C(1)-C(6)  | 114.1(3)   | C(16)-C(17)-H(17A)  | 109.1    |
| C(2)-C(1)-Au(1) | 123.3(2)   | C(18)-C(17)-H(17A)  | 109.1    |
| C(6)-C(1)-Au(1) | 122.6(2)   | C(16)-C(17)-H(17B)  | 109.1    |
| F(1)-C(2)-C(1)  | 119.5(3)   | C(18)-C(17)-H(17B)  | 109.1    |
| F(1)-C(2)-C(3)  | 116.5(3)   | H(17A)-C(17)-H(17B) | 107.8    |
| C(1)-C(2)-C(3)  | 123.9(3)   | C(17)-C(18)-H(18A)  | 109.5    |
| F(2)-C(3)-C(4)  | 119.0(3)   | C(17)-C(18)-H(18B)  | 109.5    |
| F(2)-C(3)-C(2)  | 121.2(3)   | H(18A)-C(18)-H(18B) | 109.5    |
| C(4)-C(3)-C(2)  | 119.8(3)   | C(17)-C(18)-H(18C)  | 109.5    |
| F(3)-C(4)-C(3)  | 120.8(3)   | H(18A)-C(18)-H(18C) | 109.5    |
| F(3)-C(4)-C(5)  | 120.6(3)   | H(18B)-C(18)-H(18C) | 109.5    |
| C(3)-C(4)-C(5)  | 118.6(3)   | C(7)-N(1)-C(8)      | 175.8(3) |
| F(4)-C(5)-C(4)  | 119.2(3)   | C(11)-O(1)-C(14)    | 118.0(2) |

## 2. Figs. S1-S8



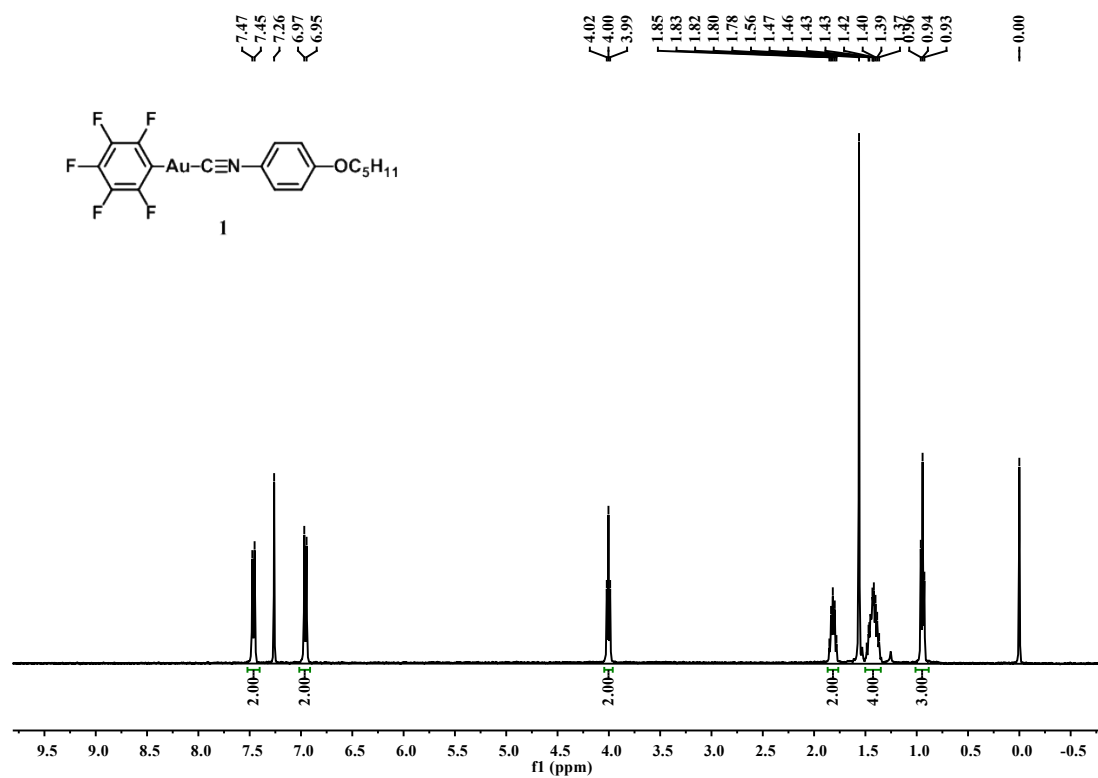

**Fig. S1.** <sup>1</sup>H NMR spectrum of complex **1** in CDCl<sub>3</sub> at room temperature.

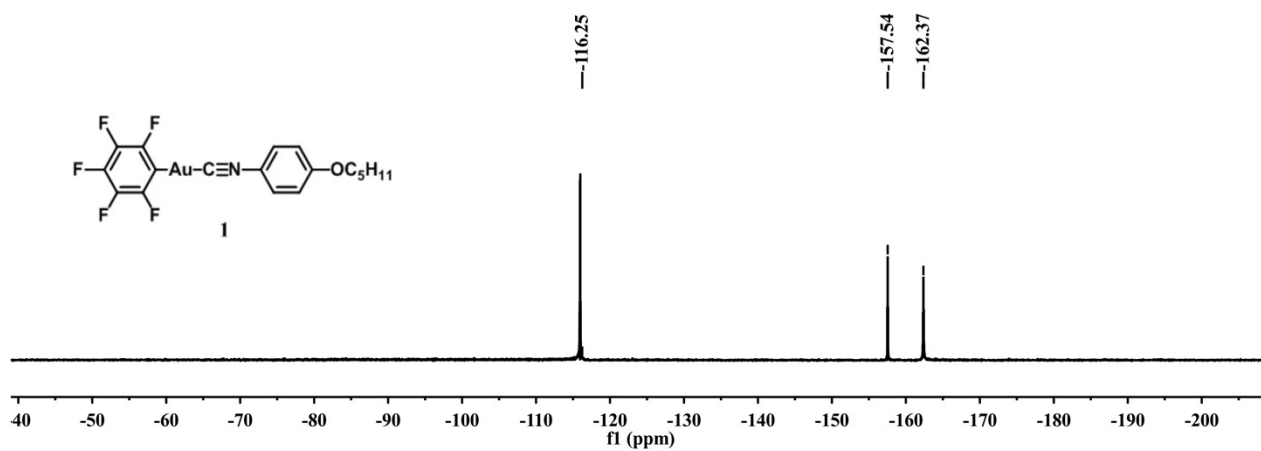

**Fig. S2.** <sup>19</sup>F NMR spectrum of complex **1** in CDCl<sub>3</sub> at room temperature.

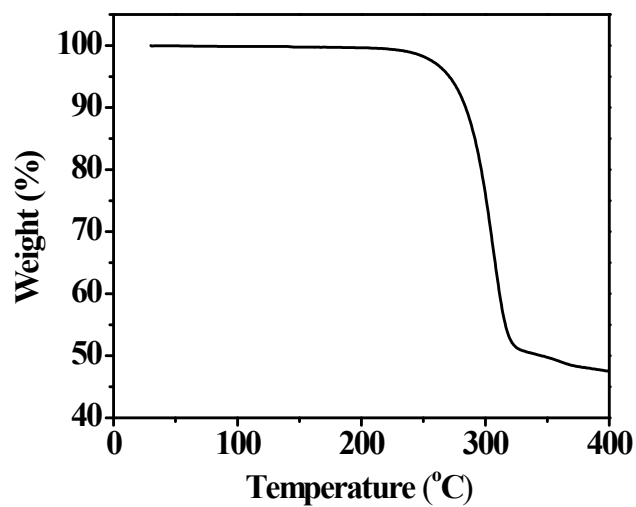

**Fig. S3.** Thermal gravimetric analysis (TGA) thermogram of complex **1** at a heating rate of 10 °C min<sup>-1</sup>.

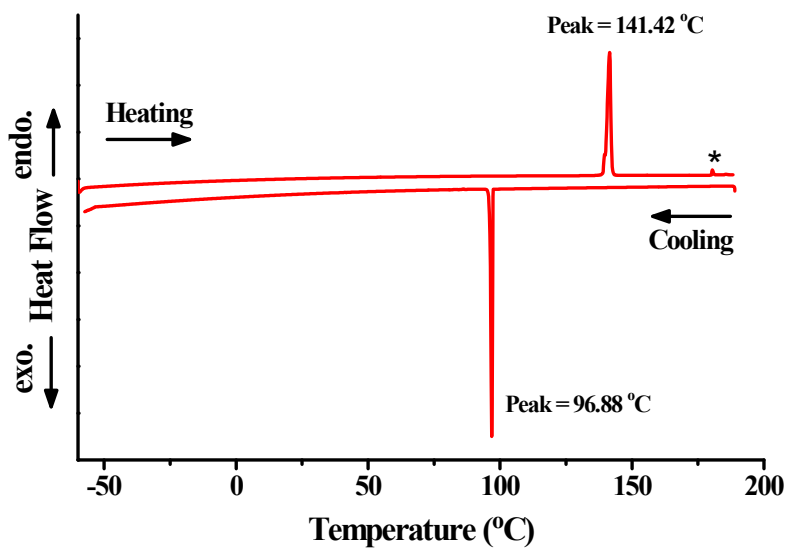

**Fig. S4.** Differential scanning calorimetry (DSC) curves of complex **1** at a heating/cooling rate of 10 °C min<sup>-1</sup>.

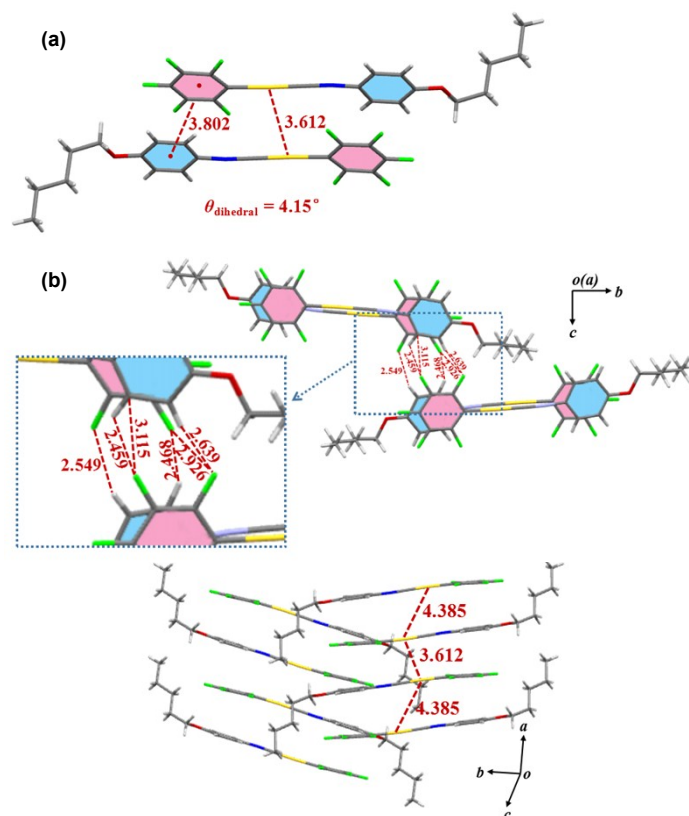

**Fig. S5.** (a) Stacked pair structure of polymorph **1B**. (b) molecular packing patterns of polymorph **1B**.

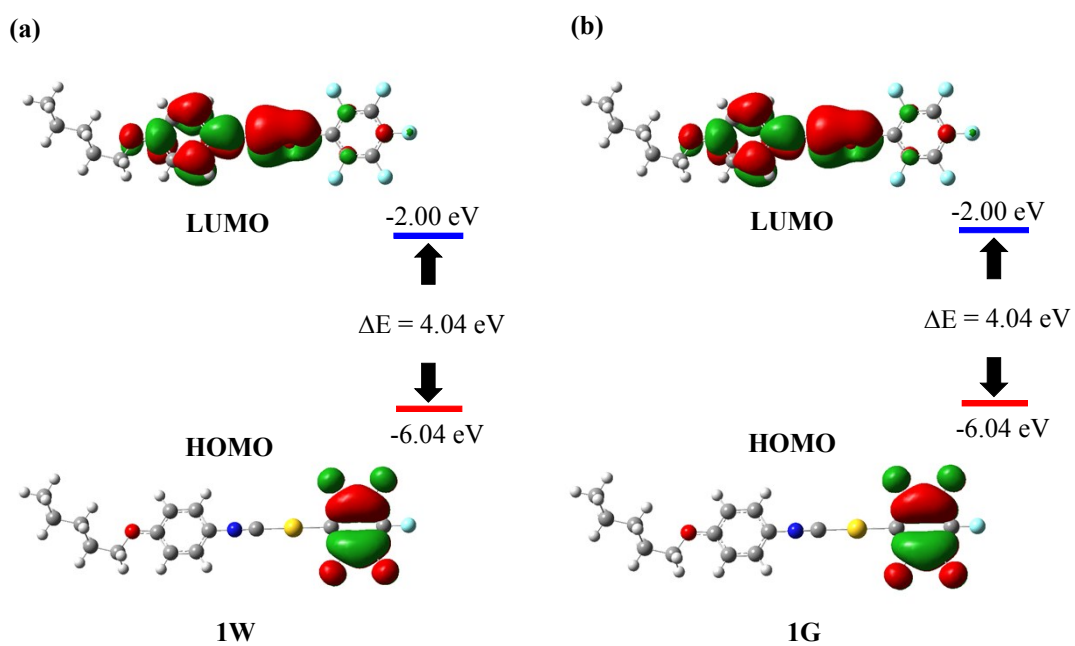

**Fig. S6.** HOMO and LUMO frontier molecular orbitals of **1W** (left) and **1G** (right) obtained at the

density functional theory (DFT) calculations level. using a B3LYP/6-31G\* basis set.

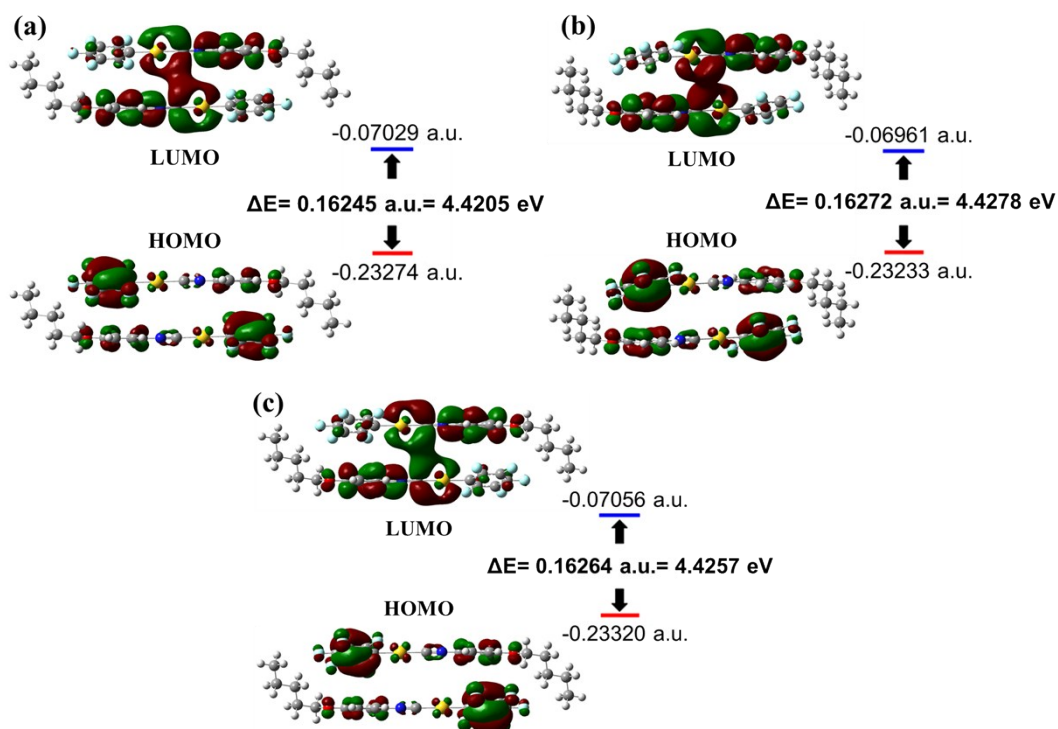

**Fig. S7.** (a) HOMO and LUMO frontier molecular orbitals of **1W** in aggregation state calculated using B3LYP/6-31G\* basis set. (b) HOMO and LUMO frontier molecular orbitals of **1B** in aggregation state calculated using B3LYP/6-31G\* basis set. (c) HOMO and LUMO frontier molecular orbitals of **1G** in aggregation state calculated using B3LYP/6-31G\* basis set.

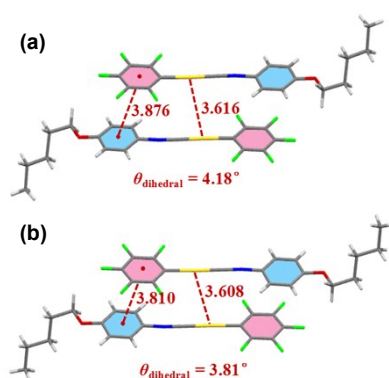

**Fig. S8.** Stacked pair structures of polymorphs (a) **1W** and (b) **1G**. Dihedral angles ( $\theta_{\text{dihedral}}$ ) between isocyanide phenyl and pentafluorophenyl groups are shown.
